# Supplementary material for: AERO-MAP: A data compilation and modelling approach to understand spatial variability in fine and coarse mode aerosol composition
Source: Copernicus journal article supplement (doi:10.5194/egusphere-2024-1617), 2024-06-21
Supplement: Supplementary file 3 [file egusphere-2024-1617-supplement.zip]

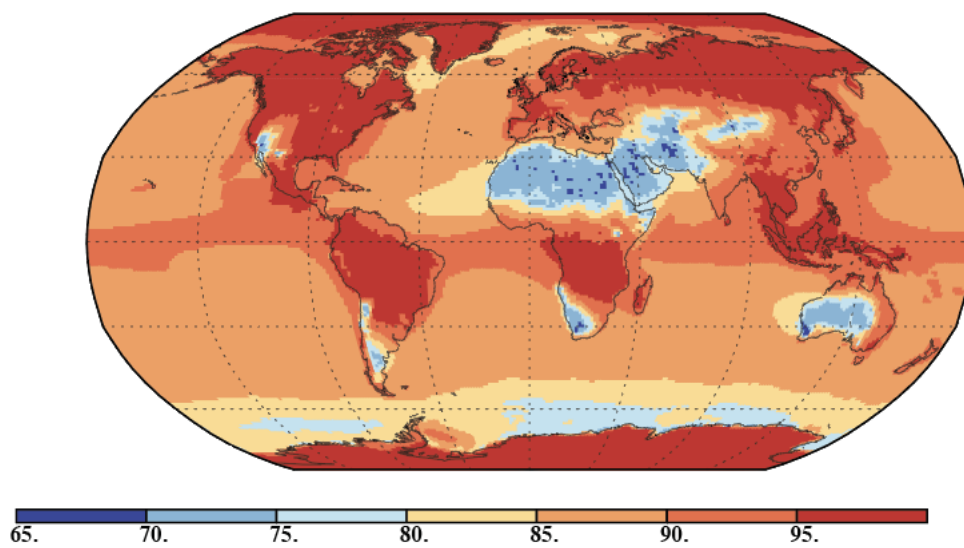

Figure S1: Modeled percentage of PM<sub>10</sub> concentrations that are within PM<sub>6.9</sub> for the annual average.

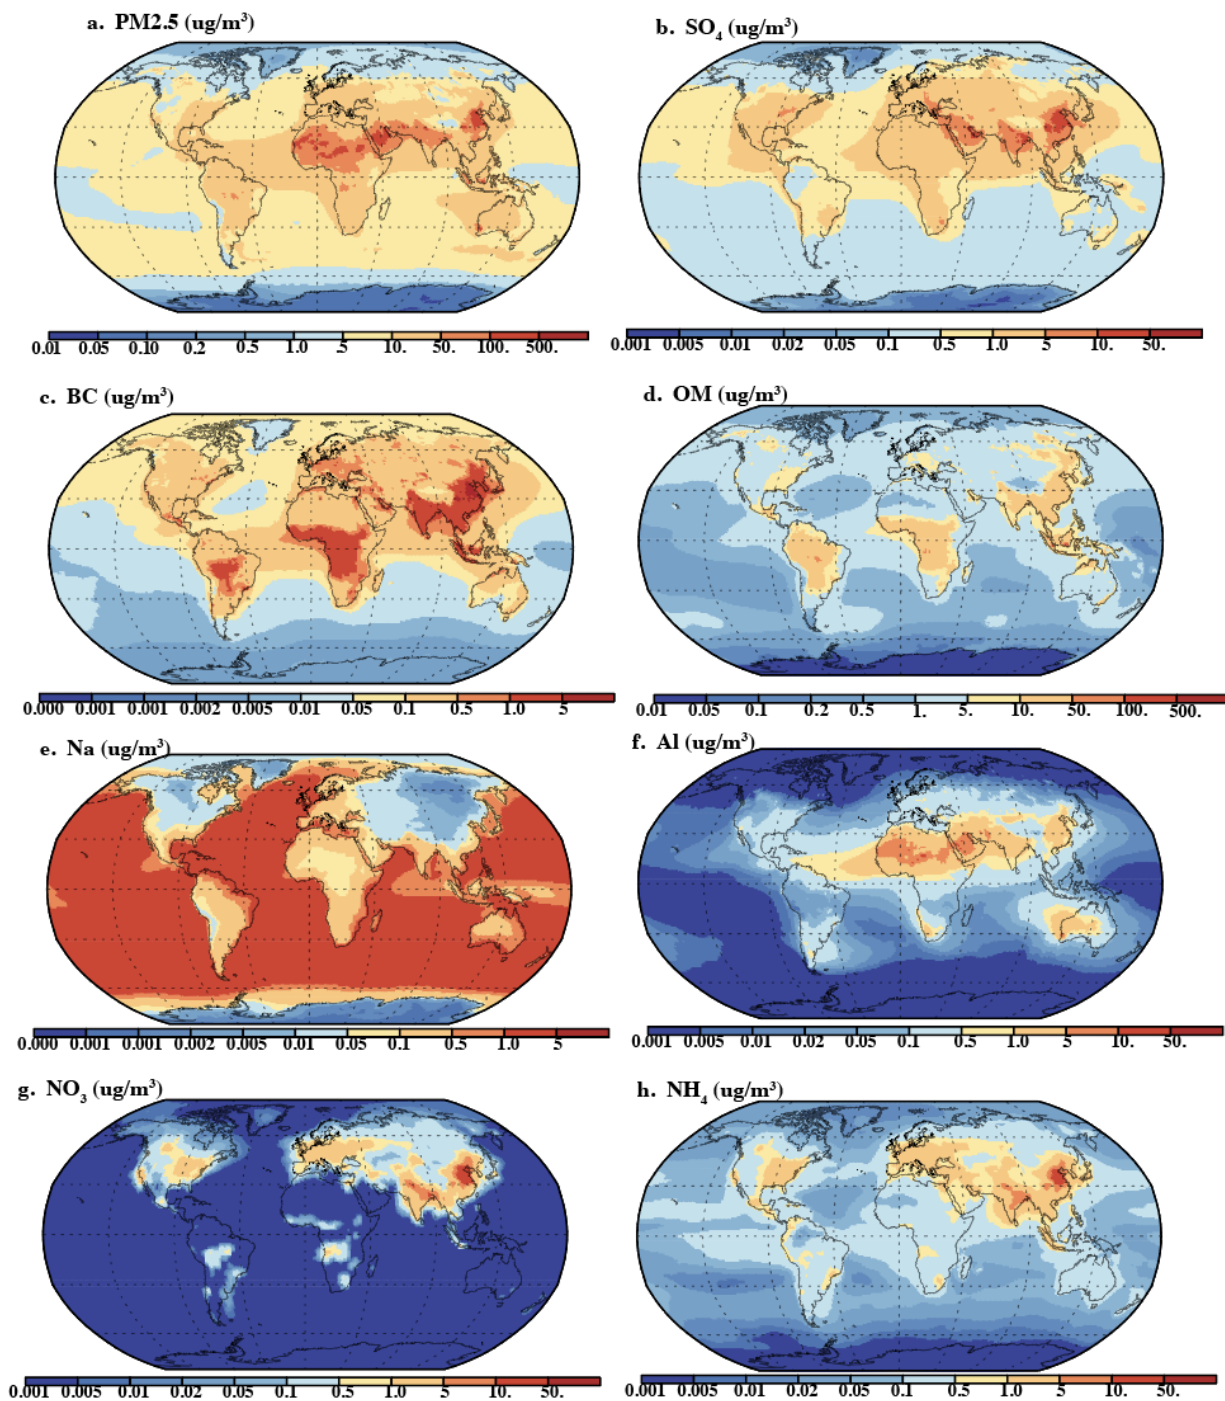

Figure S2: Modeled  $\text{PM}_{2.5}$  annual mean concentrations  $\mu\text{g}/\text{m}^3$  for a) total PM b)  $\text{SO}_4$ , c)  $\text{BC}$ , d)  $\text{OM}$ , e)  $\text{Na}$ , f)  $\text{Al}$ , g)  $\text{NO}_3$ , h)  $\text{NH}_4$ . These show the same model simulations as Figure 2 and 4, but show only the model simulations.

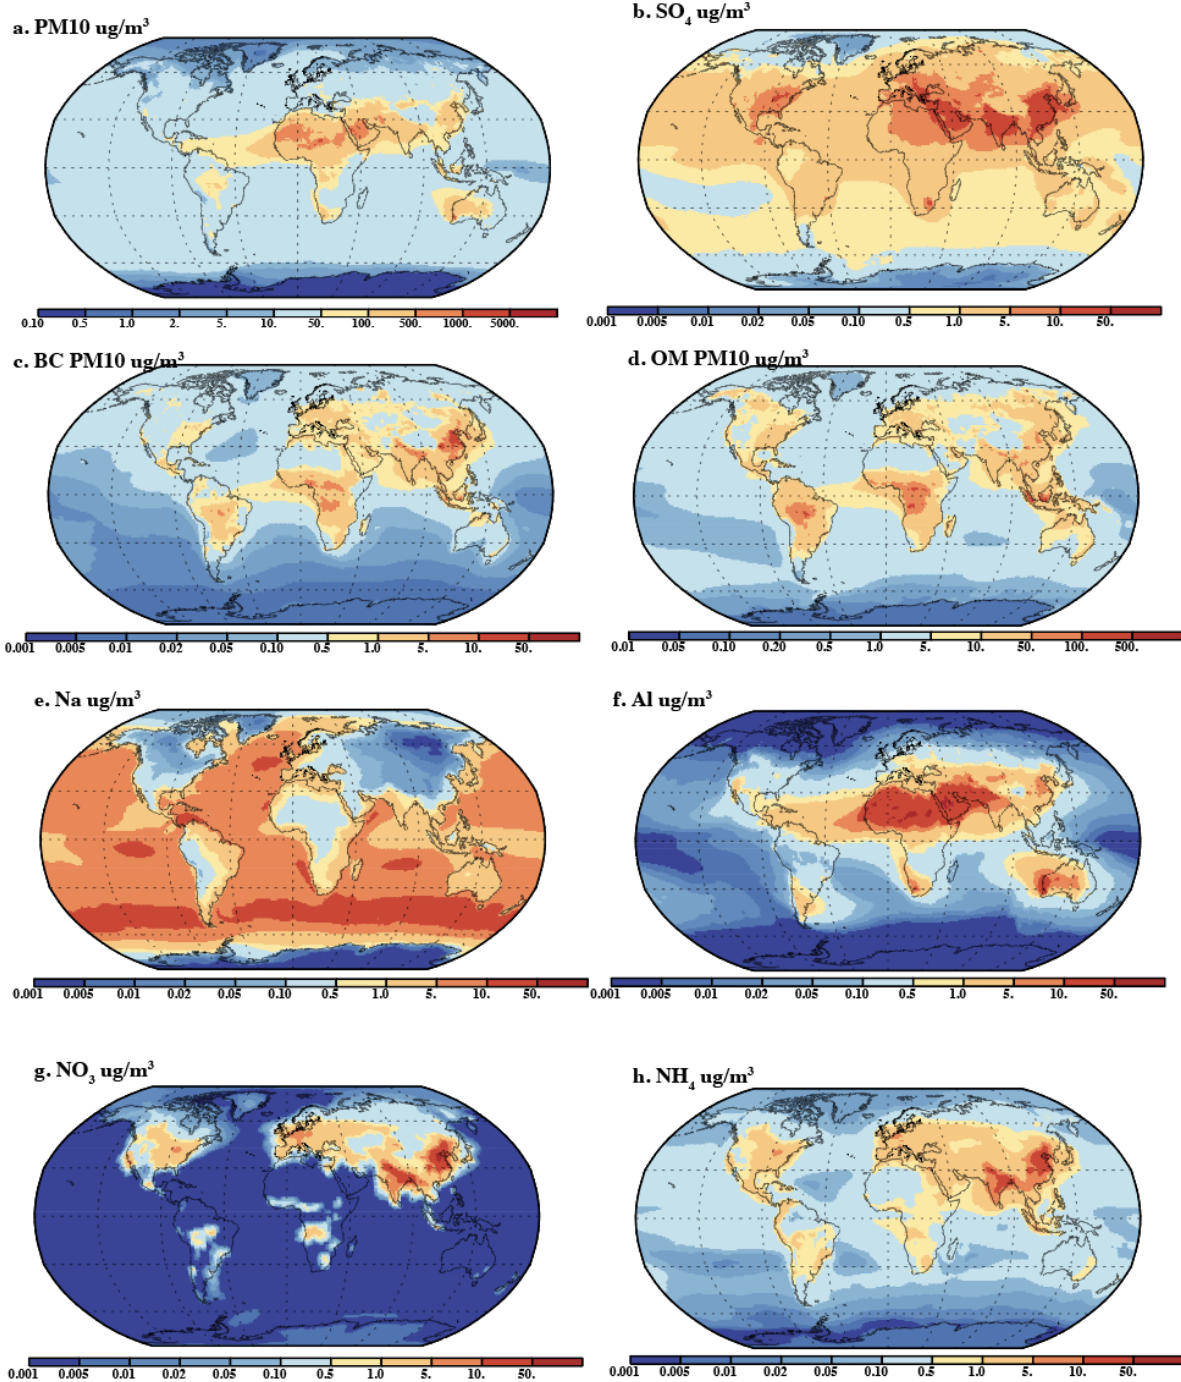

Figure S3: Modeled PM<sub>10</sub> annual mean concentrations  $\mu\text{g}/\text{m}^3$  for a) total PM b) SO<sub>4</sub>, c) BC, d) OM, e) Na, f) Al, g) NO<sub>3</sub>, h) NH<sub>4</sub>. These show the same model simulations as Figure 2 and 4, but show only the model simulations.

**Table S1:** Anthropogenic Percentage of Dust <sup>a</sup> (Table reproduced from Brodsky et al. (2023))

|                                               | North<br>America | South<br>America | North<br>Africa | South<br>Africa | Western<br>Asia | Central<br>Asia | Eastern<br>Asia | Australia       |
|-----------------------------------------------|------------------|------------------|-----------------|-----------------|-----------------|-----------------|-----------------|-----------------|
| %<br>Anthropogenic<br>Ginoux et al.<br>(2012) | 54               | 41               | 8.2             | 54              | 30              | 45              | 40              | 76 <sup>b</sup> |
| %<br>Anthropogenic -<br>Tuned Run             | 49               | 40               | 8.4             | 59              | 32              | 48              | 38              | 15              |

<sup>a</sup> Average emissions over the regions specified in Ginoux et al. (2012) were calculated and crop area effectiveness as a dust source was modified to create the tuned anthropogenic crop dust source.

<sup>b</sup> Other studies have found a lower percent agricultural dust for Australia (Bullard et al., 2008; Mahowald et al., 2009; Webb and Pierre, 2018)

Table S2: Modelled aerosol composition (rows) and assumed contribution to observed measurements (fractions).  
Model constituents that are not included in the base CESM are marked with \*.

| Modeled aerosol composition                  | Measured constituent |                 |      |      |      |      |                 |                 |
|----------------------------------------------|----------------------|-----------------|------|------|------|------|-----------------|-----------------|
|                                              | PM                   | SO <sub>4</sub> | EC   | OM   | Na   | Al   | NO <sub>3</sub> | NH <sub>4</sub> |
| SO <sub>4</sub>                              | 1.00                 | 1.00            | 0.00 | 0.00 | 0.00 | 0.00 | 0.00            | 0.00            |
| Black carbon                                 | 1.00                 | 0.00            | 1.00 | 0.00 | 0.00 | 0.00 | 0.00            | 0.00            |
| Primary Organic Matter                       | 0.50                 | 0.00            | 0.00 | 0.50 | 0.00 | 0.00 | 0.00            | 0.00            |
| Secondary Organic Carbon                     | 0.50                 | 0.00            | 0.00 | 0.50 | 0.00 | 0.00 | 0.00            | 0.00            |
| Seasalts                                     | 1.00                 | 0.00            | 0.00 | 0.00 | 0.39 | 0.00 | 0.00            | 0.00            |
| Dust                                         | 1.00                 | 0.00            | 0.00 | 0.00 | 0.00 | 0.07 | 0.00            | 0.00            |
| NO <sub>3</sub> *                            | 0.50                 | 0.00            | 0.00 | 0.00 | 0.00 | 0.00 | 0.50            | 0.00            |
| NH <sub>4</sub> *                            | 1.00                 | 0.00            | 0.00 | 0.00 | 0.00 | 0.00 | 0.00            | 1.00            |
| Agricultural dust*                           | 1.00                 | 0.00            | 0.00 | 0.00 | 0.00 | 0.07 | 0.00            | 0.00            |
| Road dust*                                   | 1.00                 | 0.00            | 0.00 | 0.00 | 0.00 | 0.07 | 0.00            | 0.00            |
| Coarse organic carbon*                       | 1.00                 | 0.00            | 0.00 | 1.00 | 0.00 | 0.00 | 0.00            | 0.00            |
| Coarse black carbon*                         | 1.00                 | 0.00            | 1.00 | 0.00 | 0.00 | 0.00 | 0.00            | 0.00            |
| Fine and coarse inorganic industrial matter* | 1.00                 | 0.00            | 0.00 | 0.00 | 0.00 | 0.07 | 0.00            | 0.00            |
| Bacteria and Fungi*                          | 1.00                 | 0.00            | 0.00 | 1.00 | 0.00 | 0.00 | 0.00            | 0.00            |
| Other Primary Biogenic Particles from land*  | 1.00                 | 0.00            | 0.00 | 1.00 | 0.00 | 0.00 | 0.00            | 0.00            |

Marine

organic

aerosols\*

1.00      0.00      0.00      1.00      0.00      0.00      0.00      0.00

Table S3: Measurement variables from the supplemental data which are combined in the comparisons and the factor relation. PM=particulate matter; BC=black carbon; EC=elemental carbon; OM=organic matter; OC= organic carbon; Note that the formula from Ash to dust was established by the University of Miami network (Prospero et al., 1996)

| Measured<br>reference<br>constituent | Other<br>measured<br>constituents |              |           |
|--------------------------------------|-----------------------------------|--------------|-----------|
| PM                                   | PM                                |              |           |
| SO <sub>4</sub> <sup>+2</sup>        | SO <sub>4</sub>                   | (96/32)*S    |           |
| BC                                   | BC                                | EC           |           |
| OM                                   | 1.8*OC                            | OM           |           |
| Na                                   | Na                                |              |           |
| Al                                   | Al                                | 1.4*0.07*Ash | 0.07*Dust |
| NO <sub>3</sub> <sup>-</sup>         | NO <sub>3</sub>                   |              |           |
| NH <sub>4</sub> <sup>+</sup>         | NH <sub>4</sub>                   |              |           |

Table S4: PM<sub>2.5</sub> comparison statistics for Figures 2 and 4 model data comparisons including correlation coefficient (r), intercept (A) and slope (B) for linear regression with uncertainties (sigma A and sigma B), root mean square differences (rms), average model during time of the observations (µg/m<sup>3</sup>) and the number of observations (N).

|                  | r    | A         | B    | sigma A  | sigma B  | rms<br>(µg/m <sup>3</sup> ) | avg model<br>(µg/m <sup>3</sup> ) | avg obs<br>(µg/m <sup>3</sup> ) | N obs |
|------------------|------|-----------|------|----------|----------|-----------------------------|-----------------------------------|---------------------------------|-------|
| PM               | 0.73 | -6.23E-01 | 1.55 | 1.19E-01 | 5.06E-03 | 20                          | 25                                | 17                              | 752   |
| PM (not gridded) | 0.78 | -2.31E+00 | 2.15 | 6.67E-02 | 2.16E-03 | 33                          | 38                                | 19                              | 7091  |
| SO <sub>4</sub>  | 0.73 | 2.00E-01  | 1.83 | 1.76E-02 | 7.21E-03 | 2.0                         | 3.0                               | 1.7                             | 318   |
| BC               | 0.26 | 3.27E-02  | 0.76 | 8.63E-03 | 4.57E-03 | 3.1                         | 0.6                               | 1.1                             | 221   |
| OM               | 0.38 | 6.46E-01  | 1.09 | 3.46E-02 | 6.46E-03 | 4.2                         | 4.8                               | 4.2                             | 264   |
| Na               | 0.47 | -5.44E-02 | 1.39 | 6.71E-03 | 5.62E-03 | 1.6                         | 1.0                               | 0.87                            | 283   |
| Al               | 0.32 | -4.79E-02 | 1.74 | 1.02E-02 | 8.73E-03 | 1.4                         | 1.3                               | 0.86                            | 226   |
| NO <sub>3</sub>  | 0.42 | -5.29E-02 | 3.39 | 3.28E-03 | 1.99E-02 | 0.45                        | 0.34                              | 0.13                            | 308   |
| NH <sub>4</sub>  | 0.50 | -3.16E-02 | 4.00 | 4.13E-03 | 2.05E-02 | 0.87                        | 0.42                              | 0.14                            | 290   |

Table S5: PM<sub>10</sub> comparison statistics for Figures 5 and 6 model data comparisons including correlation coefficient (r), intercept (A) and slope (B) for linear regression with uncertainties (sigma A and sigma B), root mean square differences (rms), average model during time of the observations (µg/m<sup>3</sup>) and the number of observations (N).

|                  | r     | A         | B     | sigma A  | sigma B  | rms<br>(µg/m <sup>3</sup> ) | avg<br>model<br>(µg/m <sup>3</sup> ) | avg obs<br>(µg/m <sup>3</sup> ) | N obs |
|------------------|-------|-----------|-------|----------|----------|-----------------------------|--------------------------------------|---------------------------------|-------|
| PM               | 0.73  | -1.76E+00 | 1.86  | 3.34E-01 | 4.49E-03 | 71                          | 69                                   | 37                              | 706   |
| PM (not gridded) | 0.76  | -7.59E+00 | 2.47  | 2.15E-01 | 2.47E-03 | 86                          | 90                                   | 40                              | 6219  |
| SO <sub>4</sub>  | 0.61  | 8.28E-01  | 2.46  | 6.74E-02 | 1.59E-02 | 5.6                         | 6.5                                  | 3.0                             | 167   |
| BC               | -0.04 | -7.26E-02 | 1.23  | 2.51E-01 | 1.77E-02 | 34                          | 1.94                                 | 5.0                             | 87    |
| OM               | 0.43  | 1.51E+00  | 1.69  | 1.48E-01 | 2.18E-02 | 11                          | 12                                   | 5.3                             | 72    |
| Na               | 0.34  | -4.20E-02 | 1.48  | 2.71E-02 | 1.45E-02 | 4.5                         | 2.0                                  | 1.3                             | 132   |
| Al               | 0.50  | -4.26E-02 | 3.18  | 2.17E-02 | 2.23E-02 | 3.7                         | 2.6                                  | 0.72                            | 111   |
| NO <sub>3</sub>  | 0.44  | 8.17E-02  | -0.01 | 5.13E-04 | 0.00E+00 | 3.3                         | 2.7                                  | 1.7                             | 138   |
| NH <sub>4</sub>  | 0.59  | -8.34E-03 | 4.62  | 2.72E-02 | 3.52E-02 | 8.4                         | 3.7                                  | 0.55                            | 142   |
